# Supplementary material for: Noninvasive Imaging Estimation of Myocardial Iron Repletion Following Administration of Intravenous Iron: The Myocardial‐IRON Trial
Source: PubMed Central journal article supplement — J Am Heart Assoc. 2020 Feb 13;9(4):e014254. doi: 10.1161/JAHA.119.014254 (PMC7070181; doi:10.1161/jaha.119.014254), 2020-02-13
Supplement: JAH3-9-e014254-s001.pdf [file JAH3-9-e014254-s001.pdf]

# **SUPPLEMENTAL MATERIAL**

**Table S1. Inclusion and exclusion criteria.**

| <b>Inclusion criteria</b>                                                                                                                                                                                                                                                                                                                                                                                                                                                                                                                                                                                                           |
|-------------------------------------------------------------------------------------------------------------------------------------------------------------------------------------------------------------------------------------------------------------------------------------------------------------------------------------------------------------------------------------------------------------------------------------------------------------------------------------------------------------------------------------------------------------------------------------------------------------------------------------|
| <ul style="list-style-type: none"><li>▪ Outpatients with chronic HF</li><li>▪ Older than 18 years</li><li>▪ NYHA II-III with optimal medical treatment in the last 4 weeks, without dose changes of HF treatment in the last 2 weeks (except for diuretics)</li><li>▪ NT-proBNP &gt;400 pg/mL</li><li>▪ LVEF &lt;50% in the last 12 months</li><li>▪ ID, defined as: serum ferritin &lt;100µg/L, or 100-299µg/L if TSAT &lt;20% and Hemoglobin &lt;15 g/dL</li><li>▪ Participants are willing and able to give informed consent for participation in the study</li></ul>                                                            |
| <b>Exclusion criteria</b>                                                                                                                                                                                                                                                                                                                                                                                                                                                                                                                                                                                                           |
| <ul style="list-style-type: none"><li>▪ Known intolerance to FCM</li><li>▪ History of acquired iron overload</li><li>▪ Severe valve disease or cardiac surgery scheduled in the next 30 days</li><li>▪ ACS, TIA, or ictus in the 3 previous months</li><li>▪ CABG, major surgery, or cardiac, cerebrovascular or aortic percutaneous intervention (diagnostic angiography is allowed) in the 3 previous months</li><li>▪ Scheduled revascularization in the next 30 days</li><li>▪ Scheduled CRTD implantation in the next 30 days</li><li>▪ Active bleeding in the last 30 days</li><li>▪ Active infection or malignancy</li></ul> |

- Immediate need for transfusion or hemoglobin  $\geq 15\text{g/dL}$
- Anemia for reasons other than ID
- Immunosuppressive therapy or dialysis
- History of treatment with erythropoietin, intravenous iron, or transfusion in the previous 12 weeks
- Treatment with oral iron at doses  $>100\text{mg/day}$  in the previous week
- Contraindications to MRI, including non-compatible pacemakers or defibrillators, cochlear implants, cerebral aneurysm clips, claustrophobia, or abdominal obesity not allowing the realization of the test due to a physical space problem.
- Pregnant or lactating women
- Subject of childbearing age who is unwilling to use adequate contraceptive measures during the study and up to 5 half-lives after the administration of study treatment
- Participation in another trial at the time of inclusion or in the previous 30 days
- Any disorder that compromises the ability to sign informed consent and/or comply with study procedures

ACS: acute coronary syndrome; CABG: coronary artery by-pass surgery, CRTD: cardiac resynchronization therapy device; HF: heart failure; NT-proBNP: amino-terminal pro-brain natriuretic peptide; FCM: ferric carboxymaltose, ID: iron deficiency; LVEF: left ventricle ejection fraction; NYHA: New York Heart Association; TIA: transient ischemic attack, TSAT: transferrin saturation.

**Table S2. Patients' characteristics by visit.**

| Patients' characteristics   | Baseline            |                   |         | 7-day visit       |                       |         | 30-day visit        |                      |         | Omnibus p-value |
|-----------------------------|---------------------|-------------------|---------|-------------------|-----------------------|---------|---------------------|----------------------|---------|-----------------|
|                             | Placebo (n=26)      | Iron (n=27)       | p-value | Placebo (n=26)    | Iron (n=27)           | p-value | Placebo (n=26)      | Iron (n=27)          | p-value |                 |
| CMR T1-mapping, msec        | 1071.5 (1030, 1116) | 1082 (1052, 1122) | 0.395   | 1071 (1038, 1112) | 1064 (1048, 1095)     | 0.919   | 1068.5 (1040, 1088) | 1081 (1066, 1109)    | 0.471   | <0.001          |
| CMR T2*, msec               | 37 (31, 42)         | 40 (34, 45)       | 0.217   | 39 (35, 42)       | 38 (35, 41)           | 0.644   | 38.5 (34, 45)       | 38 (36, 42)          | 0.769   | 0.001           |
| CMR LVEF, %                 | 36 (31, 45)         | 44 (36, 49)       | 0.242   | 39 (34, 49)       | 43 (35, 53)           | 0.365   | 40 (31, 46)         | 45 (38, 53)          | 0.129   | 0.017           |
| 6MWT, m                     | 273 (228, 342)      | 312 (221, 383)    | 0.869   | 286.5 (240, 360)  | 306 (240, 362)        | 0.881   | 297.5 (264, 384)    | 312 (228, 372)       | 0.738   | 0.014           |
| KCCQ, overall summary score | 72.7 (54.3, 91.1)   | 75.0 (63.0, 92.2) | 0.426   | 78.3 (53.6, 88.3) | 82.3 (70.5, 94.3)     | 0.300   | 75.3 (51.0, 86.3)   | 84.4 (68.8, 91.7)    | 0.140   | 0.012           |
| TSAT, %                     | 15.4 (9.6, 20.0)    | 15.7 (12.0, 19.2) | 0.472   | 15.0 (11.0, 21.7) | 39.0 (27.0, 44.8)     | 0.001   | 14.8 (10.0, 20.0)   | 27.2 (23.0, 36.8)    | <0.001  | 0.001           |
| Ferritin, pg/mL             | 47.8 (23.0, 73.0)   | 73.0 (56.0, 94.0) | 0.217   | 45.5 (21.0, 70.0) | 944.0 (790.8, 1097.2) | <0.001  | 55.5 (29.3, 81.7)   | 447.0 (294.0, 599.9) | <0.001  | <0.001          |

|                     |                        |                      |       |                       |                      |       |                      |                      |       |       |
|---------------------|------------------------|----------------------|-------|-----------------------|----------------------|-------|----------------------|----------------------|-------|-------|
|                     | 114.0)                 | 126.0)               |       | 109.0)                | 1356.0)              |       | 107.0)               | 632.3)               |       |       |
| Hemoglobin,<br>g/dL | 13.4 (12.7,<br>14.6)   | 13.1 (11.9,<br>13.4) | 0.267 | 13.3 (12.6,<br>14.4)  | 12.6 (12.1,<br>13.6) | 0.315 | 13.1 (12.3,<br>14.1) | 13.1 (12.5,<br>14.2) | 0.943 | 0.178 |
| NT-proBNP,<br>pg/mL | 1213.5<br>(1010, 2667) | 1990 (976,<br>2830)  | 0,960 | 1328.5 (821,<br>3268) | 1790 (1009,<br>2973) | 0,422 | 1409 (805,<br>2978)  | 2111 (858,<br>3122)  | 0.500 | 0.856 |

CMR: cardiac magnetic resonance; KCCQ: Kansas City Cardiomyopathy Questionnaire; LVEF: left ventricle ejection fraction; *NT-proBNP*: amino-terminal pro-brain natriuretic peptide; TSAT: transferrin saturation; 6MWT: 6-minute walking test.

Continuous values are expressed as median (interquartile range).
